# Supplementary material for: Impact of free access to leisure facilities and community outreach on inequalities in physical activity: a quasi-experimental study
Source: PubMed Central journal article supplement (PMC5868528; doi:10.1136/jech-2017-209882), 2018-01-12
Supplement: jech-2017-209882supp001.pdf [file jech-2017-209882supp001.pdf]

## The impact of free access to leisure facilities on inequalities in physical activity: a quasi-experimental study.

### Supplementary appendices.

#### Appendix 1. ITS model

##### Interrupted time series.

$$\ln(\text{gymswim}) = B_1 \cdot \text{re:fresh} + B_2 \cdot \text{time1} + B_3 \cdot \text{time2} + \text{quarter}$$

Where gymswim is the total number of attendances at leisure centres in Blackburn with Darwen for gym and/or swim activities in each quarter.

re:refresh is a dummy variable that is 0 before 3<sup>rd</sup> quarter of 2008 and 1 after.

Time1 is a time trend term for before the 3<sup>rd</sup> quarter of 2008, (set to zero after)

Time2 is a time trend term for after the 3<sup>rd</sup> quarter of 2008, (set to zero before)

Quarter is a set of dummy variables for the four quarters of the year.

As is shown in web Figure 3 there is some evidence of autocorrelation in the data. The regression was therefore estimated with Newey-West standard errors. We used the automatic lag selection procedure outlined by Newey and West<sup>1</sup> to set the maximum lag order of autocorrelation, this identified a maximum lag of 8 as appropriate. In practice as the effect size is very large this made very little difference to the findings, sensitivity analysis using other maximum lags from 1 to 8, gave results that were identical for the first two decimal places, and all p values were <0.001.

##### Analysis of residuals distribution and autocorrelation.

**Web Figure 1 Kernel density plot of residuals – indicating that the distribution is approximately normal.**

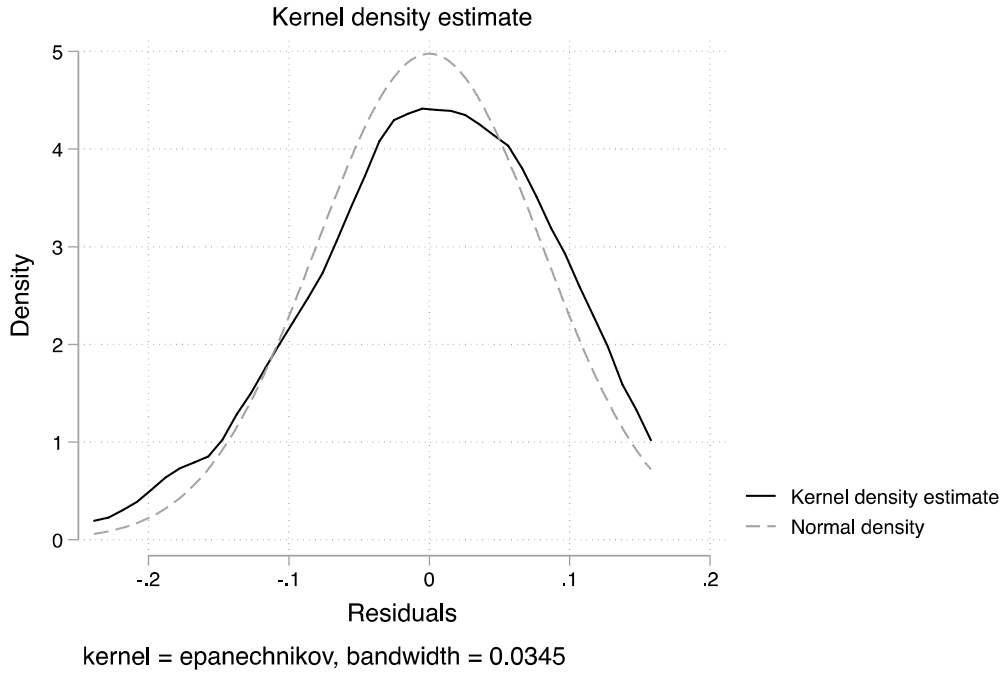

Web Figure 2 Plot of residuals over time.

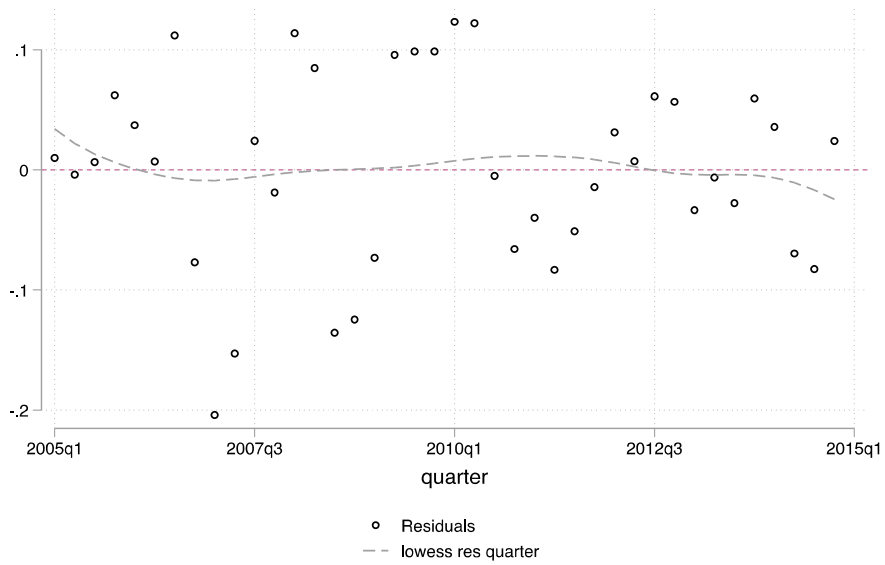

Web Figure 3 Plot showing autocorrelation of residuals.

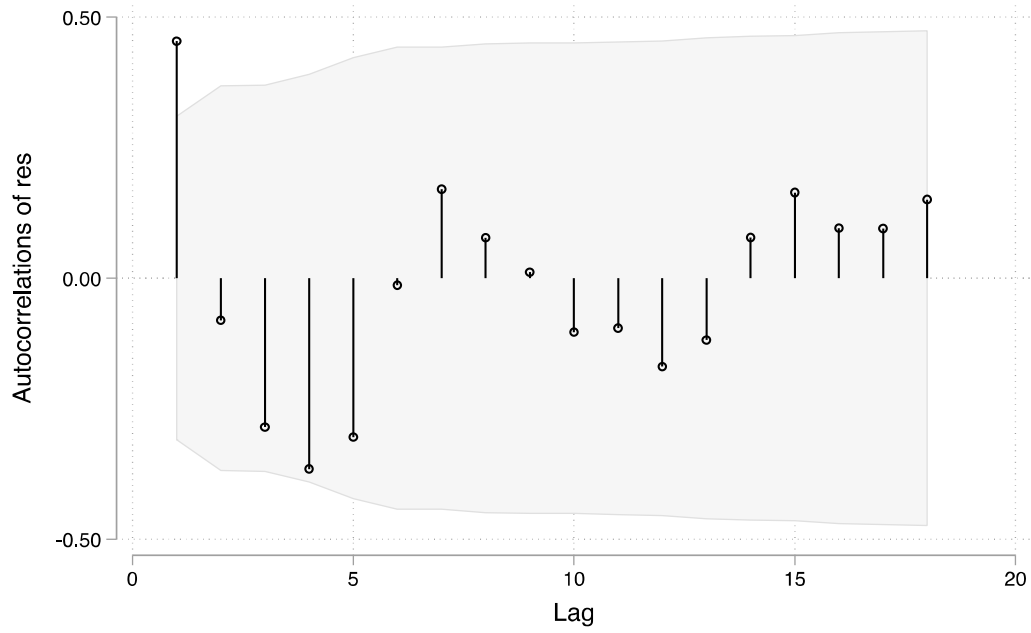

Bartlett's formula for MA(q) 95% confidence bands

**Web Figure 4 Estimated trends in gym and swimming attendances (combined) from the ITS analysis and predicted trend in the absence of the intervention.**

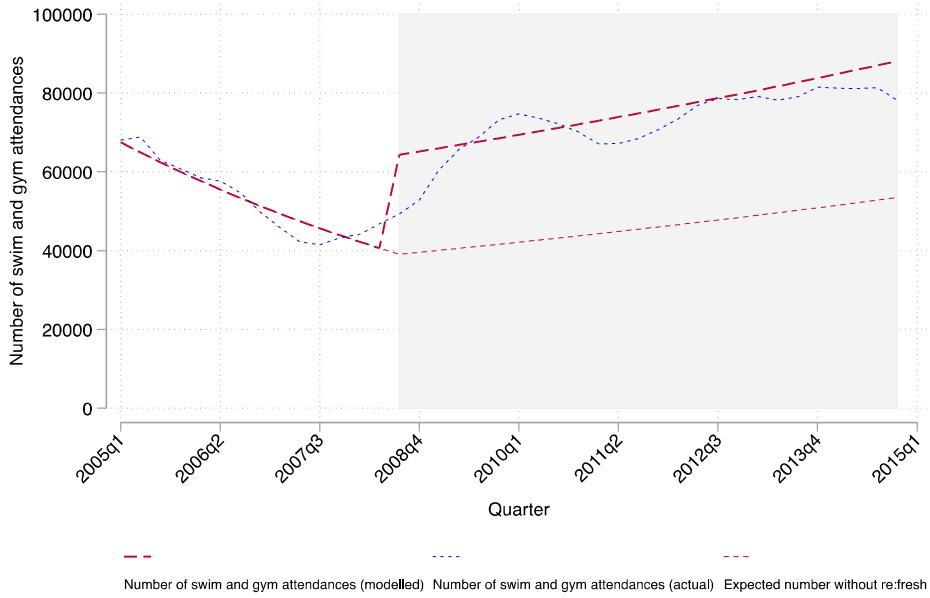

**Web Figure 5 Estimated trends in gym attendances from the ITS analysis and predicted trend in the absence of the intervention.**

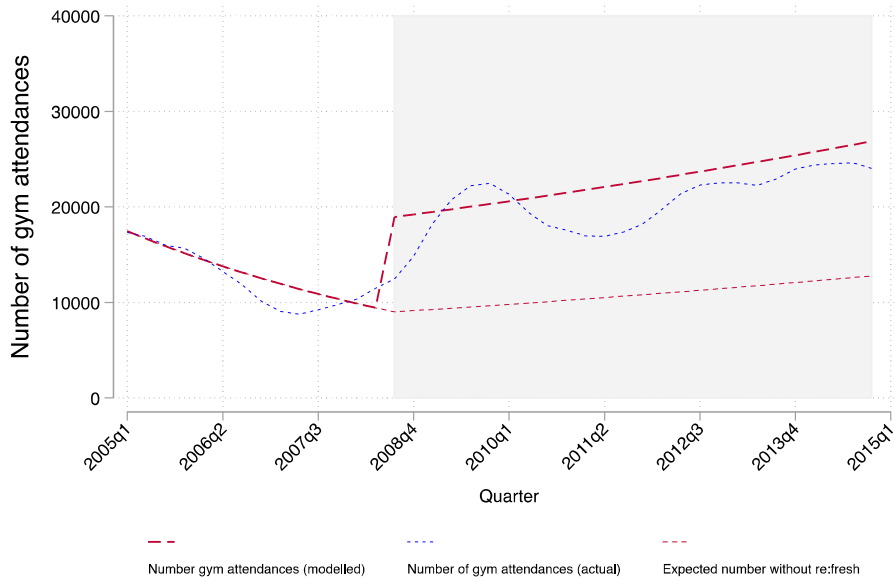

**Web Figure 6 Estimated trends in swim attendances from the ITS analysis and predicted trend in the absence of the intervention.**

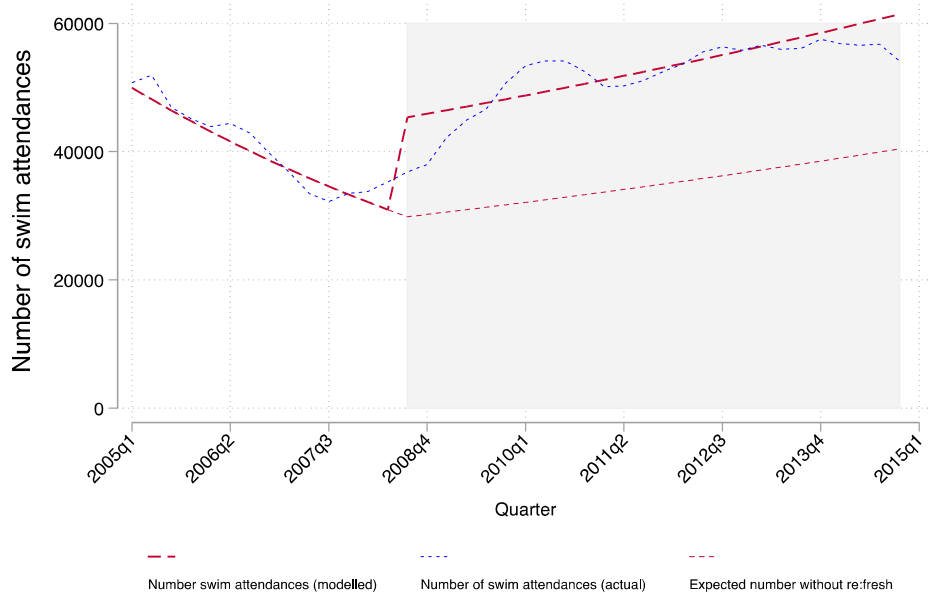

**Appendix 2. Alternative model specifications.**

**Web Table 1 Estimated increase in swim and/or gym activity associated with the introduction of re:fresh estimated from the ITS regression analysis. % increase in activity estimated as the difference in logged number of attendances.**

| <b>Outcome</b>                         | <b>Relative increase in activity associated with introduction of re:fresh (RR)</b> | <b>95% CI</b> |      | <b>P -value</b> |
|----------------------------------------|------------------------------------------------------------------------------------|---------------|------|-----------------|
| Gym attendances                        | 2.1                                                                                | 1.76          | 2.5  | <0.001          |
| Swimming attendances                   | 1.52                                                                               | 1.38          | 1.67 | <0.001          |
| Gym or swimming attendances (combined) | 1.64                                                                               | 1.43          | 1.89 | <0.001          |

**Web Table 2. Absolute increase – outcome not logged transformed as in main analysis. Estimated increase in swim or gym activity associated with the introduction of re:fresh estimated from the ITS regression analysis.**

| <b>Outcome</b>              | <b>Estimated increase in quarterly activity associated with introduction of re:fresh.</b> | <b>95% CI</b> |       | <b>P -value</b> |
|-----------------------------|-------------------------------------------------------------------------------------------|---------------|-------|-----------------|
| Gym or swimming attendances | 26472                                                                                     | 21011         | 31933 | <0.001          |

**Web Table 3. Poisson model. Estimated increase in swim or gym activity associated with the introduction of re:refresh estimated from the ITS regression analysis. Relative change in activity – relative risk.**

| Outcome                     | Estimated increase in quarterly activity associated with introduction of re:refresh (RR) | 95% CI |      | P -value |
|-----------------------------|------------------------------------------------------------------------------------------|--------|------|----------|
| Gym or swimming attendances | 1.66                                                                                     | 1.65   | 1.67 | <0.001   |

### **Appendix 3. Differences in Differences. Model formula and alternative model specifications**

#### *Difference in Differences.*

$$\text{Outcome}_{ikt} = B_1 \text{interv}_k + B_2 \text{After}_t + B_3 \text{After}_k * \text{interv}_t + B_4 \text{SES}_{ikt} + B_5 \text{SEX}_{ikt} + B_6 \text{ethnicity}_{ikt} + B_7 \text{AGE}_{ikt} + B_8 \text{AGESQ}_{ikt} + B_9 \text{Year}_t$$

Where  $\text{interv}$  is a dummy variable indicating respondents in Blackburn with Darwen and is 0 otherwise.

$\text{After}$  is a dummy variable that is 0 before 2008 and 1 after.

$\text{After}_k * \text{interv}_t$  is the interaction between the two –  $B_3$  is therefore the DiD parameter.

Model included survey weights to adjust for non-response. We estimated robust standard errors clustered at the local authority level to allow for within LA correlation due to sampling design.

SES is a set of dummy variables for each socioeconomic group

Ethnicity is a set of dummy variables for each ethnic group

$\text{AGE}_{ikt}$  is the age of respondent  $i$  in local authority  $k$  at time period  $t$ .

AGESQ is the square of AGE

Year is a continuous variable indicating the survey year.



**Alternative difference in differences analyses.**

**1. With alternative comparator groups.**

**Table 4. Table showing the estimates of the effect of re:refresh from the difference in difference analysis – comparing results using all other LAs in England as the comparison group (as reported on the paper), as compared to restricting the comparison group to similarly deprived LAs.**

| Outcome                                                                                                                                           | Comparator group                                                                 | Percentage point increase in outcome associated with introduction of re:refresh | 95% CI |     |
|---------------------------------------------------------------------------------------------------------------------------------------------------|----------------------------------------------------------------------------------|---------------------------------------------------------------------------------|--------|-----|
|                                                                                                                                                   |                                                                                  |                                                                                 |        |     |
| % Participating in at least 30 minutes of moderate intensity gym or swim sessions in a month                                                      | 325 other LAs in England                                                         | 3.8                                                                             | 3.7    | 4   |
|                                                                                                                                                   | 42 other deprived LAs (bottom quintile)                                          | 3.0                                                                             | 2.6    | 3.4 |
|                                                                                                                                                   | 30 Other deprived LAs outside London                                             | 2.8                                                                             | 2.4    | 3.3 |
|                                                                                                                                                   | 13 other deprived LAs outside London with high BME population (highest quintile) | 2.9                                                                             | 2.2    | 3.7 |
|                                                                                                                                                   | 15 other deprived LAs in the North West                                          | 2.8                                                                             | 2.0    | 3.7 |
|                                                                                                                                                   |                                                                                  |                                                                                 |        |     |
| % participating any sport or active recreation of at least moderate intensity for at least 30 minutes on at least 12 days out of the last 4 weeks | 325 other LAs in England                                                         | 1.8                                                                             | 1.6    | 2   |
|                                                                                                                                                   | 42 other deprived LAs (bottom quintile)                                          | 1.8                                                                             | 1.2    | 2.3 |
|                                                                                                                                                   | 30 Other deprived LAs outside London                                             | 1.4                                                                             | 0.8    | 2.0 |

|  |                                                                                  |     |     |     |
|--|----------------------------------------------------------------------------------|-----|-----|-----|
|  | 13 other deprived LAs outside London with high BME population (highest quintile) | 1.4 | 0.2 | 2.5 |
|  | 15 other deprived LAs in the North West                                          | 1.5 | 0.5 | 2.4 |

**2. With intervention period set to start from 2009 rather than 2008**

**Table 5. Table showing the estimates of the effect of re:refresh from the difference in difference analysis – With intervention period set to start from 2009 rather than 2008.**

| Outcome                                                                                                                                           | Percentage point increase in outcome associated with introduction of re:refresh | 95% CI |     |
|---------------------------------------------------------------------------------------------------------------------------------------------------|---------------------------------------------------------------------------------|--------|-----|
|                                                                                                                                                   |                                                                                 |        |     |
| % Participating in at least 30 minutes of moderate intensity gym or swim sessions in a month                                                      | 3.9                                                                             | 3.7    | 4.1 |
| % participating any sport or active recreation of at least moderate intensity for at least 30 minutes on at least 12 days out of the last 4 weeks | 0.9                                                                             | 0.8    | 1.1 |

### 3. Separate analysis for gym and swimming participation.

**Web Figure 7 . Estimates of the effect of the introduction of re:refresh from the difference-in-differences analysis on (1) % participating in gym activity and (2) % participating in swim activity at least once in the past month Results for all socioeconomic groups in Blackburn with Darwen and separately for 3 socioeconomic groups. Effect sizes indicate the additional percentage of the population participating due to the intervention.**

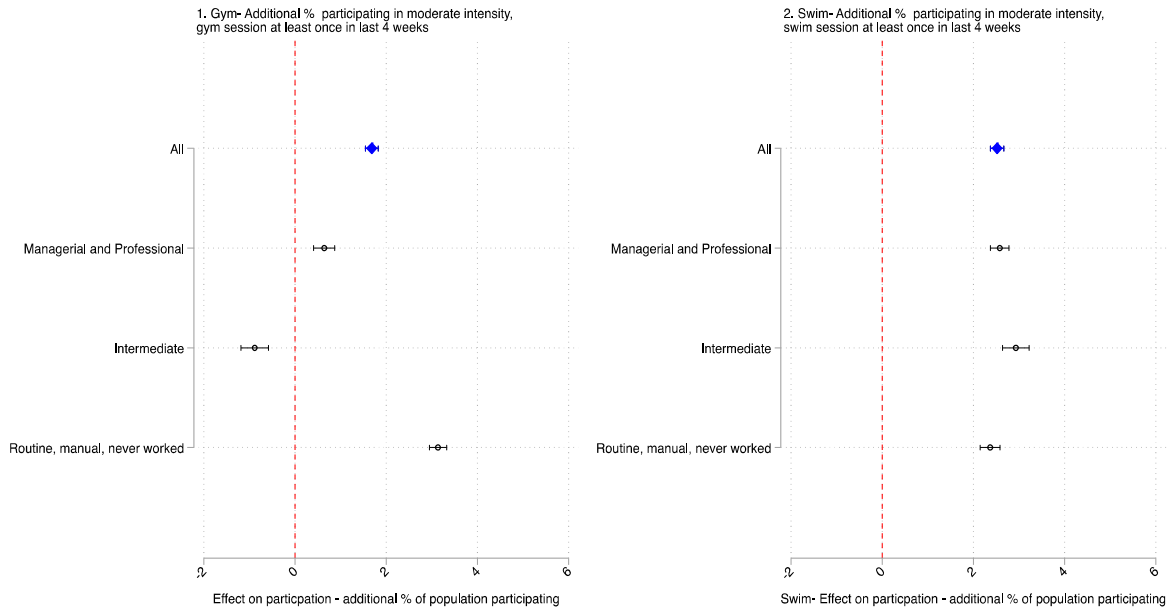

### 4. Analysis by socioeconomic group with never worked removed from lowest socioeconomic group.

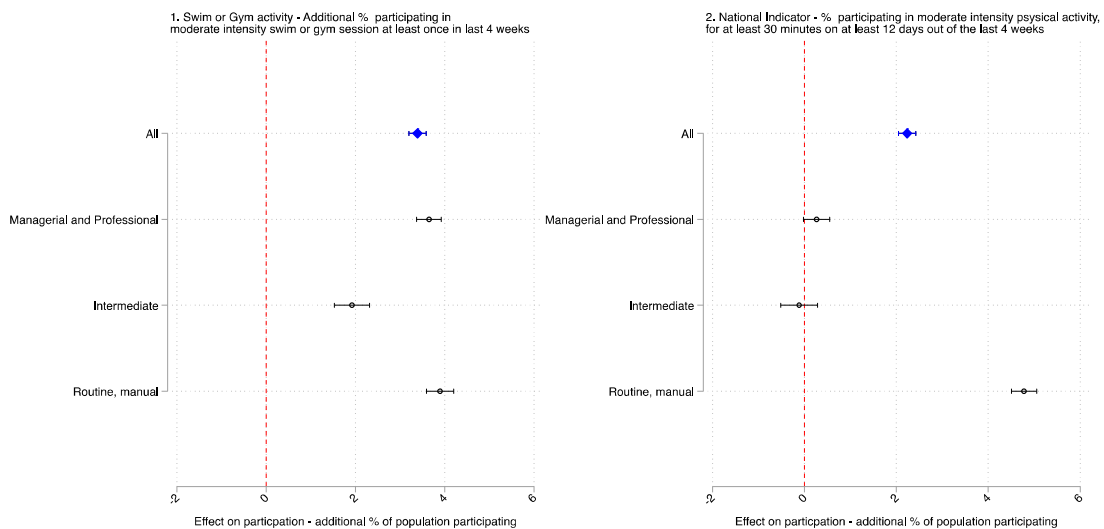

**Appendix 4. Inequalities in participation before and after intervention by socioeconomic group.**

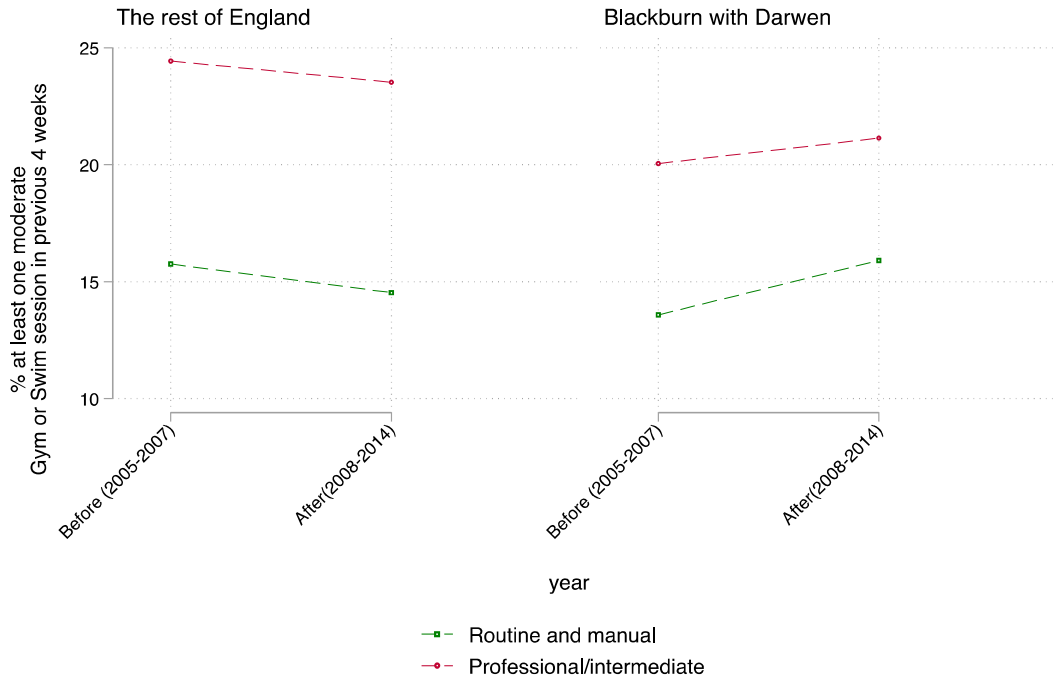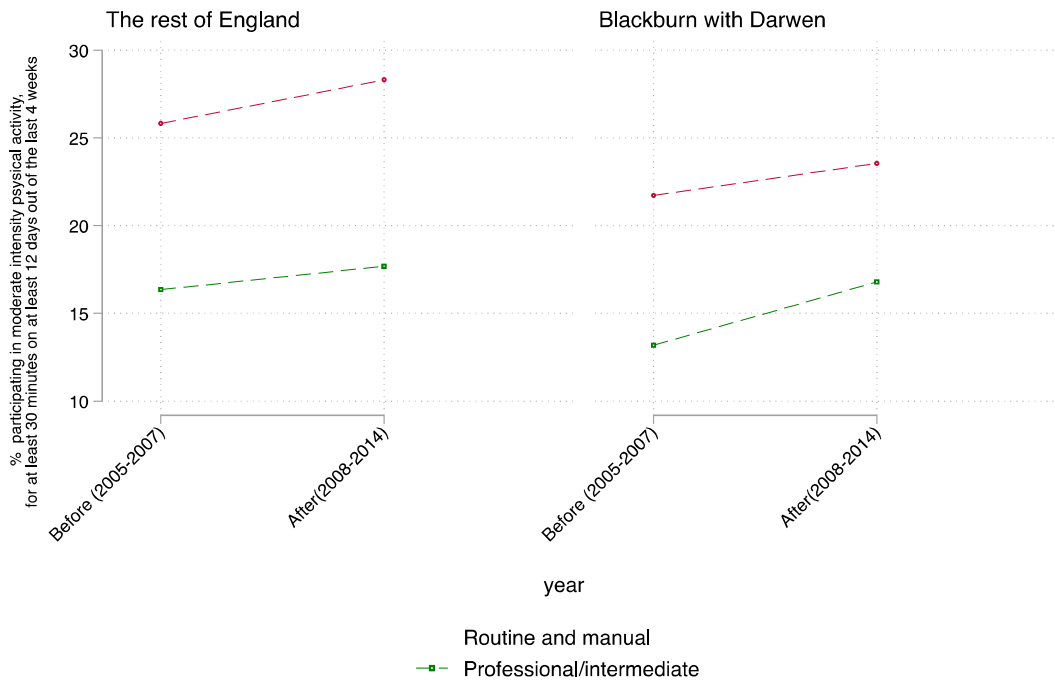

**Appendix 5. Map of Blackburn with Darwen showing distribution of facilities in relation to area deprivation.**

**1. Swimming Pools**

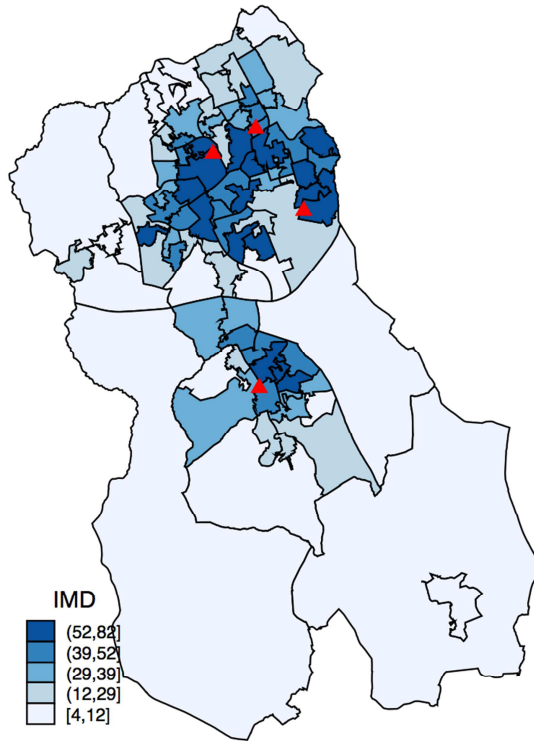

**2. Gyms**

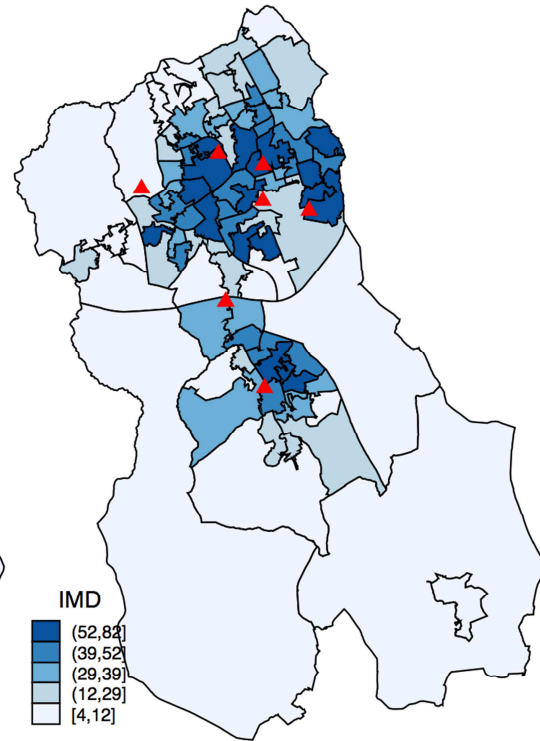

**Appendix 6. Comparison between Swimming and Gym rates in the Active Peoples Survey and the Health Survey for England.**

Table 6 shows the rates of swimming and gym related activity in the Active Peoples Survey and the Health Survey for England in 2008 showing very similar rates between the two surveys.

**Web Table 6.**

|                                 | <b>Any swimming in the past 4 weeks (95% CI)</b> | <b>Any gym/Exercise bike/Weight training activity in the past 4 weeks</b> |
|---------------------------------|--------------------------------------------------|---------------------------------------------------------------------------|
| Active People Survey (2008-09)  | 13.3%( 13.0 to 13.5)                             | 14.0% ( 13.8 to 14.2)                                                     |
| Health Survey for England 2008. | 13.6% (13.0 to 14.1)                             | 14.6% (14.0 to 15.3)                                                      |

**Active Peoples Survey**

Q9. So thinking about *the last four weeks, that is since [^INSERT^]*, did you do any sporting or recreational physical activity?

1. Yes
2. No
3. Don't know

Asked if Q9==1

Q10. What have you done? DO NOT PROMPT. CODE ALL MENTIONED. WHERE A DATABASE SEARCH BRINGS UP A NUMBER OF ACTIVITIES FOR A SPORT PLEASE PROBE CAREFULLY FOR THE EXACT ACTIVITY UNDERTAKEN. IF ACTIVITY NOT ON DATABASE CODE OTHER AND ENTER AS OTHER SPECIFY.

**Health Survey for England.**

**ActPhy:** Can you tell me if you have done any activities on this card during the last 4 weeks, that is since *(date of interview – 4 weeks)*? Please include teaching, coaching, training and practice sessions.

1 Yes 2 No

**IF ActPhy = Yes THEN WhtAct**

**WhtAct :** Which have you done in the last four weeks? **PROBE:** Any others? **CODE ALL THAT APPLY.**

- 1 Swimming
- 2 Cycling
- 3 Workout at a gym/Exercise bike/Weight training
- 4 Aerobics/Keep fit/Gymnastics/ Dance for fitness
- 5 Any other type of dancing
- 6 Running/Jogging
- 7 Football/Rugby
- 8 Badminton/tennis
- 9 Squash
- 10 Exercises (e.g. press-up, sit-ups).
